# Supplementary material for: Appropriate Selection of materials for making durable Self Compacting Concrete And application in Underground Structures
Source: Research Square preprint supplement (doi:10.21203/rs.3.rs-701160/v3), 2021-07-20
Supplement: Supplementary file 1 [file 5e6165a5df68ae1e3a6e9d92.pdf]

CIN:U74990DL2010PTC354497

## TEST REPORT

Test Report Issued To:

**L&T - STEC JV, MUMBAI UGC 07**

L&T BUSINESS PARK, TC-II, TOWER B, 1ST FLOOR,  
GATE NO.5,  
SAKI VIHAR ROAD, POWAI,  
MUMBAI, MAHARASHTRA - 400072,  
INDIA

Test Report No: M210415020/M210415020-111

Date of Issue: 05-May-2021

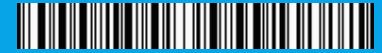

Sample Receipt Date: 15-Apr-2021

Date of Start of Testing: 15-Apr-2021

Date of Completion of Test: 05-May-2021

Customer Relationship Number 53332

**Sample Description :**

10 MM COARSE AGGREGATE, SOURCE-MS INFRA

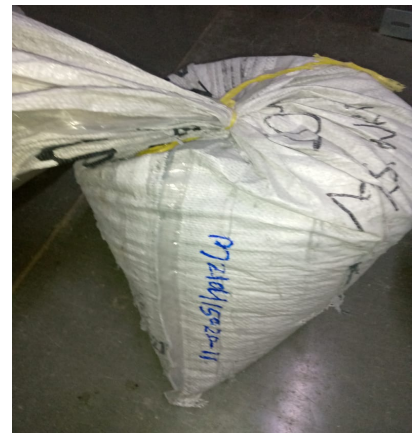

**Customer Reference No**

LT-STEC-AA0-QAS-P07-QC-230 DT. 14/04/2021

**Kind Attention :** MR. SANDIP SONULE

**E-Mail:** sandip.sonule@sucgi.in

**Contact No:** 7840879956

**Sample Condition :** GOOD

Sample Quantity (Approx) : -

Sample Size (Approx) : -

SAMPLE NOT DRAWN BY OUR LABORATORY. THE RESULTS RELATE ONLY TO THE ITEMS TESTED

Report Issued By

ULR-TC816321000003508F

Authenticity of report can be verified by mail at [verification@spectrolab.in](mailto:verification@spectrolab.in)

This is a Digitally Signed Report and hence doesn't require Physical Signature.

Spectro SSA Labs Pvt. Ltd, R-489, Rabale, MIDC, Navi Mumbai- 400701 (India)

Phone :022-25893335 || Web : [www.spectrossa.com](http://www.spectrossa.com) || Email:[ratan@spectro.in](mailto:ratan@spectro.in)

ISO 9001:2015 & ISO 45001:2018 Certified Laboratory

Please refer to our Website <http://www.spectro.in/spectro-policies.html> for Terms & Condition

ID-M210415020-11

| Sl. No. | Tests                                         | Results | Requirements<br>(as per IS: 383-2016)                  | Conformity | Test Method     |
|---------|-----------------------------------------------|---------|--------------------------------------------------------|------------|-----------------|
| 1       | Specific Gravity                              | 2.78    | ---                                                    | ---        |                 |
| 2       | Bulk Density, Kg/litre                        |         |                                                        |            | IS: 2386 (Pt.3) |
|         | a) Loose                                      | 1.47    | ---                                                    | ---        | 1963            |
|         | b) Compacted                                  | 1.56    | ---                                                    | ---        |                 |
| 3       | Water Absorption, %                           | 1.98    | ---                                                    | ---        |                 |
| 4       | Combined Flakiness & Elongation Index, %      | 18.45   | 40 Max.                                                | Yes        | IS: 2386 (Pt.1) |
| 5       | Flakiness Index, %                            | 9.35    | ---                                                    | ---        | 1963            |
| 6       | Elongation Index, %                           | 9.10    | ---                                                    | ---        |                 |
| 7       | Soundness, % (after 5 cycles)                 |         |                                                        |            | IS: 2386 (Pt.5) |
|         | (a) With Sodium Sulphate                      | 2.64    | 12 Max.                                                | Yes        | 1963            |
|         | (b) With Magnesium Sulphate                   | 2.76    | 18 Max.                                                | Yes        |                 |
| 8       | Aggregate Crushing Value, %                   | 14.1    | 30 Max. Wearing Surface<br>45 Max. Non-Wearing Surface | Yes<br>Yes | IS: 2386 (Pt.4) |
| 9       | Aggregate Impact Value, %                     | 9.7     | 30 Max. Wearing Surface<br>45 Max. Non-Wearing Surface | Yes<br>Yes | 1963            |
| 10      | Aggregate Abrasion Value, %<br>(Loss Angeles) | 18.5    | 30 Max. Wearing Surface<br>50 Max. Non-Wearing Surface | Yes<br>Yes |                 |
| 11      | 10 % Fine Value, (Tonnes)                     | 27.1    | ---                                                    | ---        |                 |
| 12      | Deleterious Material, %                       |         |                                                        |            | IS: 2386 (Pt.2) |
|         | (a) Material Finer than 75 Microns            | 0.84    | 1 Max.                                                 | Yes        | 1963            |
|         | (b) Coal & Lignite                            | 0.0     | 1 Max.                                                 | Yes        |                 |
|         | (c) Clay Lumps                                | 0.0     | 1 Max.                                                 | Yes        |                 |
|         | (d) Total Deleterious Material                | 0.84    | 2 Max                                                  | Yes        |                 |
| 13      | Sieve Analysis, % passing                     |         |                                                        |            | IS: 2386 (Pt.1) |
|         | Sieve Sizes                                   |         |                                                        |            | 1963            |
|         | 12.5 mm                                       | 100     | 100                                                    | Yes        |                 |
|         | 10.0 mm                                       | 97.2    | 85-100                                                 | Yes        |                 |
|         | 4.75 mm                                       | 4.8     | 0-20                                                   | Yes        |                 |
|         | 2.36 mm                                       | 1.1     | 0-5                                                    | Yes        |                 |

  
Analyst Signature

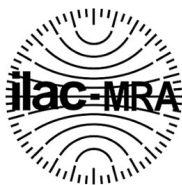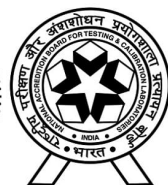

ULR-TC816321000003508F

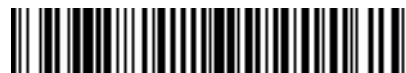

Authorised Signatory

**ID- M210415020-11**

**Chemical Properties**

| Sr. No. | Tests                                         | Results      | Requirements (as per IS: 383:2016) (Amnd-1:2017) | Test Method                      | Conformity |
|---------|-----------------------------------------------|--------------|--------------------------------------------------|----------------------------------|------------|
| 1       | Alkali Aggregate Reactivity                   |              |                                                  |                                  |            |
|         | a) Dissolved Silica (millimoles/litre)        | 21.09        | ---                                              | IS:2386(PART-7)1963              | ----       |
|         | b) Reduction in Alkalinity (millimoles/litre) | 117.03       | ---                                              | IS:2386(PART-7)1963              | ----       |
|         | c) Nature of Aggregate                        | Innocuous    | Shall Be Innocuous                               | IS:2386(PART-7)1963              | Yes        |
| 2       | Water soluble Chloride (as Cl), % by mass     | BLQ (< 0.01) | 0.04 Max.                                        | IS:14959 (P-2)2001 (Amnd-1:2007) | Yes        |
| 3       | Sulphate (as SO <sub>3</sub> ), % by mass     | BLQ (< 0.01) | 0.5 Max.                                         | IS:4032 -1985 (Amnd-2:2010)      | Yes        |

Note: BLQ=Below limit quantification

-- End of Test Report --

ULR-TC816321000003508F

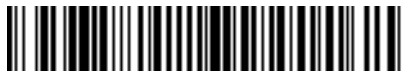

  
Analyst Signature

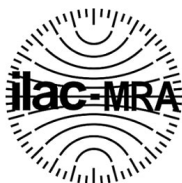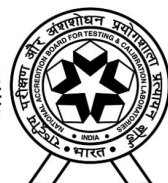

Testing(TC-8163)

Authorised Signatory
